# Supplementary material for: Phosphorus Improves Stoichiometric Characteristics of Saline-Sodic Soil and Alfalfa
Source: Research Square preprint supplement (doi:10.21203/rs.3.rs-8299360/v1), 2025-12-16
Supplement: Supplementary file 1 [file 2052e8de0579d04187c9f075.xlsx]

## Sheet: pH
Treatment	Depth of tillage	Mean	SD
CK	0-10	8.215	0.005
CK	10-20	8.255	0.015
CK	20-30	8.315	0.015
CL1	0-10	8.085	0.025
CL1	10-20	7.875	0.055
CL1	20-30	7.995	0.055
CL2	0-10	8.03	0.02
CL2	10-20	7.755	0.035
CL2	20-30	7.925	0.015
CL3	0-10	7.955	0.035
CL3	10-20	7.77	0.04
CL3	20-30	8.025	0.015

## Sheet: EC
Treatment	Depth of tillage	Mean	SD
CK	0-10	686.333	9.71253
CK	10-20	680.667	11.5036
CK	20-30	661.667	10.504
CL1	0-10	625	2
CL1	10-20	589	2
CL1	20-30	616.5	1.5
CL2	0-10	602	9
CL2	10-20	588.5	0.5
CL2	20-30	596.5	5.5
CL3	0-10	600.5	3.5
CL3	10-20	589	2
CL3	20-30	598	3

## Sheet: BD
Treatment	Mean	SD
CK	1.46	0.01583
CL1	1.235	0.01121
CL2	1.215	0.00707
CL3	1.215	0.01536

## Sheet: AK
Treatment	Depth of tillage	Mean	SD
CK	0-10	152.705	0.405
CK	10-20	145.785	0.555
CK	20-30	143.32	0.06
CL1	0-10	170.875	0.415
CL1	10-20	166.06	0.6
CL1	20-30	162.245	0.135
CL2	0-10	176.39	0.55
CL2	10-20	167.335	0.085
CL2	20-30	165.955	0.465
CL3	0-10	180.995	0.565
CL3	10-20	174.125	1.515
CL3	20-30	168.155	0.535

## Sheet: AN
Treatment	Depth of tillage	Mean	SD
CK	0-10	10.2004	0.02001
CK	10-20	10.6116	0.20002
CK	20-30	10.7213	0.7
CL1	0-10	17.405	0.275
CL1	10-20	22.865	0.335
CL1	20-30	19.39	0.07
CL2	0-10	20.4	0.27
CL2	10-20	24.465	0.115
CL2	20-30	21.685	0.045
CL3	0-10	20.82	0.09
CL3	10-20	24.845	0.065
CL3	20-30	21.94	0.48

## Sheet: AP
Treatment	Depth of tillage	Mean	SD
CK	0-10	10.1167	1.00818
CK	10-20	16.4033	1.46936
CK	20-30	17.1433	1.46889
CL1	0-10	27.9033	1.08859
CL1	10-20	23.8633	1.88665
CL1	20-30	20.3867	1.50859
CL2	0-10	24.9467	2.97819
CL2	10-20	25.4633	1.24589
CL2	20-30	23.1833	2.17829
CL3	0-10	25.8167	2.36018
CL3	10-20	27.3433	2.44017
CL3	20-30	23.9367	2.50025
