# Supplementary material for: Phosphorus Improves Stoichiometric Characteristics of Saline-Sodic Soil and Alfalfa
Source: Research Square preprint supplement (doi:10.21203/rs.3.rs-8299360/v1), 2025-12-16
Supplement: Supplementary file 2 [file 2e78b8d3de9f6bfe54a1b454.docx]

| Treatment | Aluminum sulfate（kg hm-2) |
| --- | --- |
| CK | 0 |
| CL1 | 24 |
| CL2 | 48 |
| CL3 | 72 |
