# Supplementary material for: Phosphorus Improves Stoichiometric Characteristics of Saline-Sodic Soil and Alfalfa
Source: Research Square preprint supplement (doi:10.21203/rs.3.rs-8299360/v1), 2025-12-16
Supplement: Supplementary file 3 [file daae8d1275d4a1c34478f02d.docx]

| Soil | Depth（cm） | SOM (g·kg-1) | NO3--N (mg·kg-1) | Available K (mg·kg-1) | Available P (mg·kg-1) | pH | EC (μS·cm-1) | Bulk density (g·cm-3) |
| --- | --- | --- | --- | --- | --- | --- | --- | --- |
|
| Soda saline soil | 0-10 | 29.24±2.11 | 10.20±1.23 | 152.39±5.24 | 20.28±1.61 | 8.32±0.07 | 686.33±3.21 | 1.45±0.01 |
| 10-20 | 32.70±2.17 | 10.61±1.83 | 147.11±4.17 | 24.71±1.28 | 8.26±0.10 | 680.67±4.15 | 1.51±0.03 |
| 20-30 | 27.45±1.97 | 10.72±1.56 | 143.26±5.59 | 17.26±1.02 | 8.22±0.11 | 661.67±3.63 | 1.42±0.01 |
